# Supplementary material
Source: PubMed Central journal article supplement (PMC8349715)
Supplement: Supp_Data.pdf [file Supp_Data.pdf]

## Supplementary Data

SUPPLEMENTARY TABLE S1. HOUSING ISSUE DOMAINS IDENTIFIED IN UNSTRUCTURED ELECTRONIC HEALTH RECORD DATA AT JOHNS HOPKINS HEALTH SYSTEM (2016 TO 2018)

|                                                   | <i>n</i> | <i>%</i> |
|---------------------------------------------------|----------|----------|
| <b>Housing Issues (N = 46,114)*</b>               |          |          |
| Homelessness <sup>†</sup>                         | 8579     | 18.6%    |
| Housing Instability                               | 20,854   | 45.2%    |
| Characteristics of the Building                   | 16,681   | 36.2%    |
| <b>Homelessness Events (N = 9605)<sup>‡</sup></b> |          |          |
| Currently Homeless                                | 5347     | 55.7%    |
| Homelessness Being Addressed <sup>¶</sup>         | 3139     | 32.7%    |
| History of Homelessness                           | 1119     | 11.6%    |

\*Note that this excludes the patients identified having housing issues using structured EHR data. This only includes number of patients with mentions of housing issues in their free-text provider's note. We used regular expression to identify notes in each housing category. Some patients had more than one housing issue.

<sup>†</sup>Number of unique patients with homelessness (current or past).

<sup>‡</sup>Some patients had multiple homelessness events. Thus, the sum of currently homeless, homelessness being addressed, and history of homelessness (n = 9605) is higher than homelessness category alone (n = 8579).

<sup>¶</sup>Activities included connecting the patient with a social worker and/or referring them to a homeless shelter.  
EHR, electronic health record.
